# Supplementary material for: Aboriginal and Torres Strait Islander Cultural capability of overseas-trained doctors within a regional hospital health service
Source: Research Square preprint supplement (doi:10.21203/rs.3.rs-7023410/v1), 2025-08-06
Supplement: Supplementary file 1 [file 6741aa169064ff0011e13c92.docx]

**Supplementary Methods**

**Recruitment**

Participants were recruited through e-mail adverts sent via the Medical Education Unit within Bayside Health Service. The advert contained a link to the REDCap survey. The study was also advertised at hospital during Research Grand Round to allow time for in-person completion of survey. A box was supplied for staff to put their anonymous surveys into. The principal investigator then manually entered the paper copy responses into REDCap, destroying the paper versions.

**Sampling Rationale**

A pilot study was conducted as there is no previous data that correlates overseas trained doctors’ (OTDs’) delivery of cultural safe healthcare to current educational resources. This was an unpowered, opportunistic sample size due to limited number availability, namely OTDs, which we believed to be capped around 30-40.

Previous studies using the 22-item Cultural Capability Measurement Tool (CCMT) to measure the development of midwifery students’ cultural capabilities reported they achieved conceptual validity with a sample size of 49(1). There is no reason why this would differ when investigating OTDs cultural capability. Therefore, the aim of this study was to recruit between 30 to 40 OTDs from Bayside Health Service.

**Survey Procedure**

Participants could access the survey via the REDCap platform using a password protected code. Potential duplicate responses were examined manually, and two response sets were identified as incomplete duplicates; these were excluded from the data analysis. Incomplete responses were also recorded - one response set was excluded from analysis.

Participation was voluntary, and no incentives were offered to participants.

**Survey Part II – CCMT Tool**

A validated 22-item CCMT was used - a questionnaire that has been developed to measure cultural capabilities according to The Aboriginal and Torres Strait Islander Health Curriculum Framework(2).The Framework offers a national benchmark minimum requirement for health students to be able to deliver culturally capable healthcare to First Peoples and their communities upon graduation. Although it is imperative for minimum requirements to be measurable, The Framework document provides little guidance in this regard. The CCMT acts as a suitable measurable tool in this regard.

A 5-point Likert scale of 1 = strongly disagree, 2 = disagree, 3 = neither agree nor disagree, 4 = agree, 5 = strongly agree was used to judge responses to the 22-item CCMT. Negatively worded items on the CCMT were used to minimise response bias. These items were reverse coded during the data analysis phase.

**Ethical considerations**

The data was stored electronically in the password protected REDCap online survey, only accessible by the research team. All data collection was done within Bayside Health Service.

Data was stored as non-identifiable information to protect participant confidentiality. To achieve this, within REDCap, the primary investigator was blinded to the email associated with the survey response.

**References**

1. West R, Wrigley S, Mills K, Taylor K, Rowland D, Creedy DK. Development of a First Peoples-led cultural capability measurement tool: A pilot study with midwifery students. Women Birth. 2017;30:236-44.

2. Department of Health. Aboriginal and Torres Strait Islander health curriculum framework . Canberra: Australian Government, 2014. <https://www.health.gov.au/sites/default/files/documents/2020/12/aboriginal-and-torres-strait-islander-health-curriculum-framework.pdf> . Accessed 10 Jan 2025.

**Supplementary Table 1.** Inclusion and Exclusion Criteria

| **Inclusion Criteria** | **Exclusion Criteria:** |
| --- | --- |
| Overseas-trained doctors that have provisional registration with AHPRA | Australian-trained doctors |
| Employed within Bayside Health Service | Employed outside of Bayside Health Service |
| Employed between 01-07-23 and 01-07-24 | Employed outside of 01-07-23 and 01-07-24 |
| Involved with direct provision of care or advice | Not involved with direct provision of care or advice e.g. Administrator |
| Completion of Aboriginal and Torres Strait Islander Cultural Capability Module between 01-07-23 and 01-07-24 | Non-completion of Aboriginal and Torres Strait Islander Cultural Capability Module outside of 01-07-23 and 01-07-24 |

**Supplementary Table 2**. CCMT Factors and Questions

| Factors | Questions |
| --- | --- |
| 1 - Respect | Q4 = Understanding First Peoples social practices will not apply to my practice |
| Q5 = To improve First Peoples health, Indigenous cultures need to be visible in clinical and community health settings |
| Q7 = I find it difficult to understand the beliefs of different cultural groups |
| Q8 = I feel comfortable working with people from other cultures |
| Q9 = Reflecting on my own cultural values will not help me become culturally aware |
| Q10 = Acknowledging that cultural differences exist is the first step to becoming culturally capable  Q11 = Comprehensive primary health care services are fundamental to improving First Peoples health  Q12 = Improving First Peoples health is not the responsibility of all health professionals  Q13 = Evidence from research can help me in my practice in First Peoples health  Q15 = My relationship with First Peoples will not impact on clinical outcomes |
| Q16 = I believe a holistic approach to First Peoples health is important |
| 2 - Communication | Q2 = Understanding First Peoples history will inform my practice as a health professional |
| Q3 = Understanding First Peoples cultural values will influence how I practice  Q18 = First Peoples receive special treatment from government |
| Q19 = First Peoples have the same level access to health services as all other Australians |
| 3 - Safety and Quality | Q1 = History does not impact on First Peoples health  Q6 = There may be few exceptions but in general First Peoples are all the same |
| 4 - Advocacy | Q20 = I will find it difficult to advocate for improvements in First Peoples health |
| Q21 = It is difficult for me to be culturally inclusive towards First Peoples |
| Q22 = I do not have a social responsibility to work for changes in First Peoples |
| 5 - Reflection | Q14 = It is not my responsibility to challenge the way things are done in health practice |
| Q17 = All First Peoples are treated equally by health professionals |
